# Supplementary material for: Evaluation of Multiplex Rapid Antigen Tests for the Simultaneous Detection of SARS-CoV-2 and Influenza A/B Viruses
Source: MDPI journal article supplement (doi:10.3390/biomedicines11123267), 2023-12-09

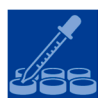**Supplementary Table S1. Mapping statistics of derived sequences of SARS-CoV-2 genomes detected using metagenomics next-generation sequencing**

| No | Sample ID | Total number of reads<br>for mapping | % of mapped reads | Depth (X) |
|----|-----------|--------------------------------------|-------------------|-----------|
| 1  | S001      | 1262808                              | 99.59%            | 6335.16   |
| 2  | S002      | 1769526                              | 99.92%            | 8877.22   |
| 3  | S020      | 2332950                              | 99.99%            | 11703.76  |
| 4  | S029      | 2103966                              | 99.99%            | 10555.01  |
| 5  | S007      | 2092602                              | 99.97%            | 10498     |
| 6  | S009      | 2303542                              | 99.98%            | 11556.23  |
| 7  | S022      | 2406276                              | 100.00%           | 12071.62  |
| 8  | S004      | 2306148                              | 99.98%            | 11569.3   |
| 9  | S015      | 1848050                              | 99.75%            | 9271.15   |
| 10 | S021      | 1695298                              | 99.86%            | 8504.84   |
| 11 | S016      | 1072420                              | 99.64%            | 5380.03   |
| 12 | S028      | 1137960                              | 99.69%            | 5708.83   |
| 13 | S093      | 1961106                              | 99.76%            | 9838.32   |
| 14 | S095      | 706398                               | 99.08%            | 3543.8    |
| 15 | S040      | 822716                               | 99.30%            | 4127.34   |
| 16 | S041      | 1286742                              | 99.40%            | 6455.23   |
| 17 | S036      | 990958                               | 99.86%            | 4971.36   |
| 18 | S010      | 1763922                              | 99.98%            | 8849.11   |
| 19 | S097      | 699676                               | 99.84%            | 3510.08   |
| 20 | S043      | 602732                               | 99.82%            | 3023.74   |
| 21 | S098      | 978836                               | 99.91%            | 4910.55   |
| 22 | S023      | 1495880                              | 99.97%            | 7504.41   |
| 23 | S008      | 1444226                              | 99.95%            | 7245.28   |
| 24 | S003      | 1774240                              | 99.99%            | 8900.87   |
| 25 | S019      | 1318578                              | 99.98%            | 6614.94   |
| 26 | S018      | 1542654                              | 99.99%            | 7739.07   |
| 27 | S024      | 2173792                              | 99.98%            | 10905.31  |
| 28 | S099      | 1697422                              | 99.97%            | 8515.49   |
| 29 | S100      | 2021714                              | 99.99%            | 10142.38  |
| 30 | S094      | 1724248                              | 99.99%            | 8650.07   |
| 31 | S012      | 2112316                              | 99.99%            | 10596.9   |
| 32 | S011      | 1766088                              | 99.99%            | 8859.97   |
| 33 | S005      | 1674104                              | 99.98%            | 8398.52   |
| 34 | S027      | 1746596                              | 99.99%            | 8762.19   |
| 35 | S030      | 1970676                              | 99.99%            | 9886.33   |
| 36 | S006      | 1821814                              | 99.99%            | 9139.54   |
| 37 | S047      | 823868                               | 99.91%            | 4133.12   |

**Supplementary Table S1. Mapping statistics of derived sequences of SARS-CoV-2 genomes detected using meta-genomics next-generation sequencing (Continued)**

| No | Sample ID | Total number of reads<br>for mapping | % of mapped reads | Depth (X) |
|----|-----------|--------------------------------------|-------------------|-----------|
| 38 | S045      | 811622                               | 99.87%            | 4071.68   |
| 39 | S059      | 748974                               | 99.28%            | 3757.39   |
| 40 | S068      | 1209792                              | 99.44%            | 6069.19   |
| 41 | S032      | 2228072                              | 99.99%            | 11177.62  |
| 42 | S026      | 1951070                              | 99.96%            | 9787.98   |
| 43 | S025      | 1732796                              | 99.99%            | 8692.96   |
| 44 | S017      | 2114686                              | 100.00%           | 10608.79  |
| 45 | S031      | 2126324                              | 100.00%           | 10667.18  |
| 46 | S014      | 2172198                              | 99.99%            | 10897.31  |
| 47 | S044      | 2245312                              | 100.00%           | 11264.11  |
| 48 | S013      | 2216882                              | 100.00%           | 11121.48  |
| 49 | S033      | 1875282                              | 99.99%            | 9407.77   |
| 50 | S046      | 1921456                              | 100.00%           | 9639.41   |
| 51 | S048      | 1948906                              | 99.98%            | 9777.12   |
| 52 | S089      | 2101616                              | 99.99%            | 10543.22  |
| 53 | S096      | 2001756                              | 99.93%            | 10042.25  |
| 54 | S050      | 2070496                              | 99.99%            | 10387.1   |
| 55 | S067      | 2297398                              | 100.00%           | 11525.41  |
| 56 | S042      | 2351800                              | 99.98%            | 11798.33  |
| 57 | S060      | 2200202                              | 99.87%            | 11037.8   |
| 58 | S071      | 2290698                              | 99.99%            | 11491.8   |
| 59 | S080      | 1988906                              | 99.64%            | 9977.79   |
| 60 | S038      | 2398256                              | 99.99%            | 12031.38  |
| 61 | S052      | 2427988                              | 100.00%           | 12180.54  |
| 62 | S084      | 2360392                              | 100.00%           | 11841.43  |
| 63 | S053      | 2423404                              | 100.00%           | 12157.55  |
| 64 | S069      | 2248794                              | 99.91%            | 11281.58  |
| 65 | S081      | 2214014                              | 99.99%            | 11107.09  |
| 66 | S051      | 1971620                              | 99.97%            | 9891.07   |
| 67 | S058      | 1722150                              | 99.98%            | 8639.55   |
| 68 | S062      | 2225462                              | 100.00%           | 11164.53  |
| 69 | S063      | 2321708                              | 100.00%           | 11647.36  |
| 70 | S076      | 2257946                              | 99.99%            | 11327.49  |
| 71 | S072      | 2274128                              | 100.00%           | 11408.67  |
| 72 | S035      | 2285694                              | 100.00%           | 11466.69  |
| 73 | S087      | 2114006                              | 100.00%           | 10605.38  |
| 74 | S064      | 2063156                              | 100.00%           | 10350.28  |
| 75 | S049      | 1650150                              | 100.00%           | 8278.34   |

**Supplementary Table S1. Mapping statistics of derived sequences of SARS-CoV-2 genomes detected using meta-genomics next-generation sequencing (Continued)**

| No  | Sample ID | Total number of reads<br>for mapping | % of mapped reads | Depth (X) |
|-----|-----------|--------------------------------------|-------------------|-----------|
| 76  | S073      | 2252404                              | 100.00%           | 11299.69  |
| 77  | S037      | 2268550                              | 100.00%           | 11380.69  |
| 78  | S070      | 2293278                              | 100.00%           | 11504.74  |
| 79  | S085      | 2213894                              | 100.00%           | 11106.49  |
| 80  | S074      | 2109744                              | 100.00%           | 10584     |
| 81  | S078      | 1756098                              | 100.00%           | 8809.86   |
| 82  | S088      | 1648690                              | 100.00%           | 8271.02   |
| 83  | S079      | 2078980                              | 99.99%            | 10429.67  |
| 84  | S077      | 2324712                              | 100.00%           | 11662.43  |
| 85  | S086      | 2150798                              | 100.00%           | 10789.96  |
| 86  | S039      | 2324064                              | 100.00%           | 11659.18  |
| 87  | S075      | 2437142                              | 100.00%           | 12226.46  |
| 88  | S066      | 2063252                              | 100.00%           | 10350.76  |
| 89  | S082      | 2088568                              | 100.00%           | 10477.77  |
| 90  | S083      | 2016944                              | 100.00%           | 10118.45  |
| 91  | S061      | 1612140                              | 100.00%           | 8087.66   |
| 92  | S065      | 2162310                              | 99.96%            | 10847.71  |
| 93  | S090      | 2053782                              | 99.99%            | 10303.25  |
| 94  | S054      | 2184114                              | 99.91%            | 10957.09  |
| 95  | S055      | 2254472                              | 99.99%            | 11310.06  |
| 96  | S091      | 2120212                              | 99.99%            | 10636.52  |
| 97  | S056      | 2135746                              | 99.99%            | 10714.44  |
| 98  | S092      | 2350204                              | 99.99%            | 11790.32  |
| 99  | S057      | 2358468                              | 99.95%            | 11831.78  |
| 100 | S034      | 2149750                              | 100.00%           | 10784.7   |

**Supplementary Table S2.** Diagnostic accuracy of RAT kits compared with rRT-PCR according to sex

| Pathogens  | RAT kits   | Sex    | TP (n) | FP (n) | TN (n) | FN (n) | Se (%) | Sp (%) | Kappa |
|------------|------------|--------|--------|--------|--------|--------|--------|--------|-------|
| SARS-CoV-2 | GenBody    | Male   | 152    | 0      | 277    | 86     | 63.87  | 100    | 0.66  |
|            |            | Female | 160    | 0      | 212    | 87     | 64.78  | 100    | 0.63  |
|            | InstaView  | Male   | 186    | 0      | 277    | 52     | 78.15  | 100    | 0.79  |
|            |            | Female | 203    | 0      | 212    | 44     | 82.19  | 100    | 0.81  |
|            | STANDARD Q | Male   | 172    | 0      | 277    | 66     | 72.27  | 100    | 0.74  |
|            |            | Female | 183    | 0      | 212    | 64     | 74.09  | 100    | 0.73  |
| FluA       | GenBody    | Male   | 131    | 0      | 294    | 90     | 59.28  | 100    | 0.62  |
|            |            | Female | 110    | 1      | 279    | 69     | 61.45  | 99.64  | 0.66  |
|            | InstaView  | Male   | 135    | 0      | 294    | 86     | 61.09  | 100    | 0.64  |
|            |            | Female | 112    | 0      | 280    | 67     | 62.57  | 100    | 0.67  |
|            | STANDARD Q | Male   | 115    | 0      | 294    | 106    | 52.04  | 100    | 0.55  |
|            |            | Female | 84     | 0      | 280    | 95     | 46.93  | 100    | 0.52  |
| FluB       | GenBody    | Male   | 8      | 0      | 499    | 8      | 50     | 100    | 0.66  |
|            |            | Female | 5      | 0      | 449    | 5      | 50     | 100    | 0.66  |
|            | InstaView  | Male   | 8      | 0      | 499    | 8      | 50     | 100    | 0.66  |
|            |            | Female | 4      | 0      | 449    | 6      | 40     | 100    | 0.57  |
|            | STANDARD Q | Male   | 4      | 0      | 499    | 12     | 25     | 100    | 0.39  |
|            |            | Female | 4      | 0      | 449    | 6      | 40     | 100    | 0.57  |

Abbreviations: FluA, influenza A virus; FluB, influenza B virus; FP, false positive; FN, false negative; RAT, rapid antigen test; SARS-CoV-2, severe acute respiratory syndrome coronavirus-2; Se, sensitivity; Sp, specificity; TN, true negative; TP, true positive.

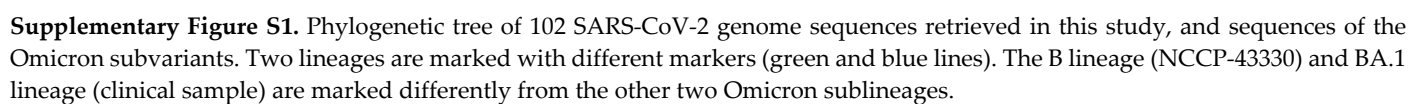

Supplement: s1 [file s1]
